# Supplementary material for: Comparative Genome and Network Centrality Analysis to Identify Drug Targets of Mycobacterium tuberculosis H37Rv
Source: Biomed Res Int. 2015 Nov 5;2015:212061. doi: 10.1155/2015/212061 (PMC4651637; doi:10.1155/2015/212061)
Supplement: Supplementary file 1 — The list contains prioritized and detailed list of proteins proposed as potential drug targets for Mycobacterium tuberculosis H37Rv. The proteins are essential to the growth and survival of the pathogen, nonhomologous with the host and found in the centre of gravity of protein-protein interactome network. The corresponding function, structural information and validation if these proteins have been reported by other methods are also incorporated. [file 212061.f1.xlsx]

## Sheet: Sheet1
Gene Name	Rv Number	Functional Class	Function	Betweenness	Eigenvector	Degree	Closeness	Cross-reference (PDB)	uniprottarget	validated targets	Raman et al. targets	TDRpostedtargets	OurpreviousList	proteins interact with host
Rv1303	Rv1303	cell wall and cell processes	unknown	115191	0.106641	207	0.0490584		√		√		√
esxR	Rv3019c	cell wall and cell processes	unknown	71224.3	0.0888949	167	0.0488181	3H6P;
Rv0311	Rv0311	conserved hypotheticals	unknown	67942.5	0.0739117	156	0.0488615					√	√
Rv0556	Rv0556	cell wall and cell processes	unknown	66400.1	0.103607	193	0.0490067
mmpS4	Rv0451c	cell wall and cell processes	unknown	66230.3	0.0961583	171	0.0488344	2LW3;
esxH	Rv0288	cell wall and cell processes	May be involved in virulence.	63475.5	0.0910269	170	0.0488555	2KG7;
hisD	Rv1599	intermediary metabolism and respiration	Involved in histidine biosynthesis pathway (tenth step). This protein is considered as a bifunctional enzyme, possessing two active sites, one an alcohol dehydrogenase and the other an aldehyde dehydrogenase [catalytic activity: L-histidinol + 2 NAD(+) + H(2)O = L-histidine + 2 NADH].	58334.6	0.00278618	82	0.0483304					√	√	√
dnaB	Rv0058	information pathways	Participates in initiation and elongation during chromosome replication; it exhibits DNA-dependent ATPase activity. The intein is an endonuclease (potential).	57680.2	0.00275039	62	0.0481486	2R5U;	√		√		√
sigA	Rv2703	information pathways	The sigma factor is an initiation factor that promotes attachment of the RNA polymerase to specific initiation sites and then is released. This is the primary sigma-factor of this bacteria. Supposedly involved in the housekeeping regulons.	56665.2	0.00454968	80	0.0483847		√				√
gltB	Rv3859c	intermediary metabolism and respiration	Probably involved in glutamate biosynthesis [catalytic activity: 2 L-glutamate + NADP(+) = L-glutamine + 2-oxoglutarate + NADPH].	54468.6	0.00280165	93	0.0483516		√
katG	Rv1908c	virulence, detoxification, adaptation	Multifunctional enzyme, exhibiting both a catalase, a broad-spectrum peroxidase, and a peroxynitritase activities. May play a role in the intracellular survival of mycobacteria within macrophages; protection against reactive oxygen and nitrogen intermediates produced by phagocytic cells. Seems regulated by SIGB|Rv2710 [catalytic activity: 2 H(2)O(2) = O(2) + 2 H(2)O].	50548	0.00563762	76	0.0484564	1SFZ;1SJ2;2CCA;2CCD;4C50;4C51;	√	√			√	√
Rv0875c	Rv0875c	cell wall and cell processes	unknown	49197.6	0.1194	197	0.0489582					√	√
lprB	Rv1274	cell wall and cell processes	unknown	46747.5	0.113241	197	0.0490025					√	√
embB	Rv3795	cell wall and cell processes	Involved in the biosynthesis of the mycobacterial cell wall arabinan and resistance to ethambutol (EMB; dextro-2,2'-(ethylenediimino)-DI-1-butanol). Polymerizes arabinose into the arabinan of arabiogalactan [catalytic activity: UDP-L-arabinose + indol-3-ylacetyl-myo-inositol = UDP + indol-3-ylacetyl-myo-inositol L-arabinoside].	46319.9	0.0533371	127	0.04885			√
Rv3604c	Rv3604c	cell wall and cell processes	unknown	43248.6	0.0454048	99	0.048616				√
ftsK	Rv2748c	cell wall and cell processes	Possibly involved in cell division processes	41667.4	0.00344695	54	0.0481615		√				√
rpoZ	Rv1390	information pathways	Promotes RNA polymerase assembly. Latches the N-and C-terminal regions of the beta' subunit thereby faciltating its interaction with the beta and alpha subunits [catalytic activity: N nucleoside triphosphate = N diphosphate + {RNA}N].	41235.7	0.0124497	128	0.048601					√	√
Rv0817c	Rv0817c	cell wall and cell processes	unknown	40822	0.119145	196	0.048974					√	√
Rv1610	Rv1610	cell wall and cell processes	unknown	40741.3	0.059531	118	0.0487285
Rv0358	Rv0358	conserved hypotheticals	unknown	40230.6	0.0796769	154	0.0488277
Rv2050	Rv2050	conserved hypotheticals	unknown	40088.3	0.019412	91	0.0485105	2M4V;2M6P;				√	√
rpoA	Rv3457c	information pathways	DNA-dependent RNA polymerase catalyzes the transcription of DNA into RNA using the four ribonucleoside triphosphates as substrates. The amino-terminal portion is involved in the assembly of core RNAP, whereas the C-terminal is involved in interaction with transcriptional regulators [catalytic activity: N nucleoside triphosphate = N pyrophosphate + RNA(N)].	39017.7	0.0150645	160	0.0486112					√	√
ftsZ	Rv2150c	cell wall and cell processes	Essential for cell division. It is thought that the intracellular concentration of FTSZ protein is critical for productive septum formation in mycobacteria.	37525.4	0.00763293	103	0.0484339	1RLU;1RQ2;1RQ7;2Q1X;2Q1Y;4KWE;				√	√	√
embC	Rv3793	cell wall and cell processes	Involved in the biosynthesis of the mycobacterial cell wall arabinan and resistance to ethambutol (EMB; dextro-2,2'-(ethylenediimino)-DI-1-butanol). Polymerizes arabinose into the arabinan of arabiogalactan [catalytic activity: UDP-L-arabinose + indol-3-ylacetyl-myo-inositol = UDP + indol-3-ylacetyl-myo-inositol L-arabinoside].	36733.1	0.0687207	136	0.0487904	3PTY;	√	√			√
pup	Rv2111c	intermediary metabolism and respiration	Involved in proteasomal degradation. Covalently binds to protein substrates.	35411.2	0.00444417	37	0.0479427	3M91;3M9D;				√	√
Rv1587c	Rv1587c	insertion seqs and phages	unknown	35068.1	0.0112441	54	0.0481246
Rv1476	Rv1476	cell wall and cell processes	unknown	34379.2	0.0924826	148	0.0488055					√	√
dnaN	Rv0002	information pathways	DNA polymerase III is a complex, multichain enzyme responsible for most of the replicative synthesis in bacteria. This DNA polymerase also exhibits 3' to 5' exonuclease activity. The beta chain is required for initiation of replication once it is clamped onto DNA, it slides freely (bidirectional and ATP-independent) along duplex DNA [catalytic activity: N deoxynucleoside triphosphate = N diphosph…	33375.5	0.00362037	90	0.0482796	3P16;3RB9;
embA	Rv3794	cell wall and cell processes	Involved in the biosynthesis of the mycobacterial cell wall arabinan and resistance to ethambutol (EMB; dextro-2,2'-(ethylenediimino)-DI-1-butanol). Polymerizes arabinose into the arabinan of arabiogalactan [catalytic activity: UDP-L-arabinose + indol-3-ylacetyl-myo-inositol = UDP + indol-3-ylacetyl-myo-inositol L-arabinoside].	31967.2	0.0576216	115	0.0487609		√	√			√
Rv0883c	Rv0883c	conserved hypotheticals	unknown	31779.8	0.0507829	112	0.0487399					√	√
Rv0430	Rv0430	conserved hypotheticals	unknown	31365.4	0.0227033	92	0.0485271
Rv3921c	Rv3921c	cell wall and cell processes	unknown	29409.1	0.00679982	68	0.0483753							√
Rv0412c	Rv0412c	cell wall and cell processes	unknown	29090.3	0.0459163	95	0.0484808
lpqB	Rv3244c	cell wall and cell processes	unknown	28529	0.0218647	64	0.0483889					√	√
lsr2	Rv3597c	information pathways	Dominant T-cell antigen and possibly stimulates lymphoproliferation. Has DNA-bridging activity	27758.7	0.0189428	73	0.048406	2KNG;4E1P;4E1R;				√	√
dnaE1	Rv1547	information pathways	DNA polymerase III is a complex, multichain enzyme responsible for most of the replicative synthesis in bacteria. This DNA polymerase also exhibits 3' to 5' exonuclease activity. The alpha chain is the DNA polymerase [catalytic activity: N deoxynucleoside triphosphate = N diphosphate + {DNA}(N)].	26895.5	0.00411017	75	0.048315					√	√
secY	Rv0732	cell wall and cell processes	Essential for protein export. Interacts with SECA|Rv3240c and SECE|Rv0638 to allow the translocation of proteins across the plasma membrane, by forming part of a channel.	26715.2	0.0111981	111	0.048285		√				√	√
Rv2751	Rv2751	conserved hypotheticals	unknown	26543.2	0.00010634	12	0.046424
Rv0088	Rv0088	lipid metabolism	unknown	26082.7	0.0230948	73	0.0482879						√
Rv2418c	Rv2418c	conserved hypotheticals	unknown	24712.1	0.0598967	116	0.0486058					√	√
glcB	Rv1837c	intermediary metabolism and respiration	Involved in glyoxylate bypass (second step), an alternative to the tricarboxylic acid cycle [catalytic activity: L-malate + CoA = acetyl-CoA + H(2)O + glyoxylate]	24302.4	0.00201247	47	0.0479375	2GQ3;3S9I;3S9Z;3SAD;3SAZ;3SB0;
Rv2186c	Rv2186c	conserved hypotheticals	unknown	24297.7	0.0862969	148	0.0488091
icl1	Rv0467	intermediary metabolism and respiration	Involved in glyoxylate bypass (at the first step), an alternative to the tricarboxylic acid cycle (in bacteria, plants, and fungi) [catalytic activity: isocitrate = succinate + glyoxylate]. Involved in the persistence in the host.	23928.9	0.00293969	53	0.0481574	1F61;1F8I;1F8M;
otsA	Rv3490	virulence, detoxification, adaptation	Involved in osmoregulatory trehalose biosynthesis. Mycobacteria can produce trehalose from glucose 6-phosphate and UDP-glucose (the OtsA-OtsB pathway) from glycogen-like alpha(1-->4)-linked glucose polymers (the TreY-TreZ pathway) and from maltose (the TreS pathway) [catalytic activity: UDP-glucose + D-glucose 6-phosphate = UDP + alpha,alpha-trehalose 6-phosphate].	23777.7	0.000730047	30	0.0476948					√	√
ribA2	Rv1415	intermediary metabolism and respiration	Involved in riboflavin biosynthesis [catalytic activity: GTP + 3 H(2)O = formate + 2,5-diamino-6-hydroxy-4-(5-phosphoribosylamino)pyrimidine + diphosphate].	23617.3	0.00280985	57	0.0481592							√
eccD3	Rv0290	cell wall and cell processes	unknown	23576.3	0.0738134	128	0.048616		√				√
gdh	Rv2476c	intermediary metabolism and respiration	Catabolic glutdh involved in the utilization of glutamate and other amino acids of the glutamate family. Generates 2-oxoglutarate from L-glutamate [catalytic activity: L-glutamate + H(2)O + NAD(+) = 2-oxoglutarate + NH(3) + NADH].	23373	0.00177286	60	0.048072
aftD	Rv0236c	cell wall and cell processes	Involved in the biosynthesis of the mycobacterial cell wall arabinan	23372.9	0.0359626	77	0.0485105
Rv0260c	Rv0260c	regulatory proteins	Could be involved in transcriptional mechanism.	23129.8	0.00236243	48	0.0481077
Rv2219	Rv2219	cell wall and cell processes	unknown	23090.5	0.0312973	101	0.0485605
secA1	Rv3240c	cell wall and cell processes	Involved in protein export. Interacts with the SECY/SECE subunits. SECA has a central role in coupling the hydrolysis of ATP to the transfer of PRE-secretory periplasmic and outer membrane proteins across the membrane.	22790.6	0.00369075	64	0.0481586	1NKT;1NL3;				√	√
Rv0541c	Rv0541c	cell wall and cell processes	unknown	22700.4	0.0211162	65	0.0483268
efp	Rv2534c	information pathways	Involved in peptide bond synthesis. Stimulate efficient translation and peptide-bond synthesis on native or reconstituted 70S ribosomes in vitro. Probably functions indirectly by altering the affinity of the ribosome for aminoacyl-tRNA, thus increasing their reactivity as acceptors for peptidyl transferase.	22585.9	0.0107426	123	0.0483782					√	√	√
Rv0227c	Rv0227c	cell wall and cell processes	unknown	22294.8	0.0755475	111	0.0486435						√
Rv3780	Rv3780	conserved hypotheticals	unknown	22001.6	0.0161564	70	0.0483522					√	√
Rv3201c	Rv3201c	information pathways	Has both ATPase and helicase activities	21984.8	0.00637068	39	0.0480358						√
Rv1382	Rv1382	cell wall and cell processes	unknown	21967.1	0.0320712	87	0.0485349					√
gcpE	Rv2868c	conserved hypotheticals	unknown	21919.7	0.00296851	61	0.0481311					√	√
Rv1738	Rv1738	conserved hypotheticals	unknown	21804.8	0.0135703	66	0.0483546		√		√		√
rpsC	Rv0707	information pathways	This protein is involved in the binding of initiator met-tRNA	21619.6	0.0127026	138	0.0483209
tatC	Rv2093c	cell wall and cell processes	Involved in proteins export: required for correct localization of precursor proteins bearing signal peptides with the twin arginine conserved motif S/T-R-R-X-F-L-K. This sec-independent pathway is termed tat for twin-arginine translocation system. This system mainly transports proteins with bound cofactors that require folding prior to export.	21413.9	0.00274251	52	0.0481469
Rv0585c	Rv0585c	cell wall and cell processes	unknown	21225.9	0.0203212	66	0.0483339				√
Rv2553c	Rv2553c	cell wall and cell processes	unknown	21155	0.00489551	53	0.0482962							√
Rv0666	Rv0666	cell wall and cell processes	unknown	21066	0.00163279	16	0.0474557
Rv2507	Rv2507	cell wall and cell processes	unknown	20701.4	0.0505186	93	0.0484719
Rv3658c	Rv3658c	cell wall and cell processes	unknown	20682.9	0.0432725	87	0.0485504
Rv0216	Rv0216	intermediary metabolism and respiration	unknown	20616.3	0.0193986	57	0.0482126	2BI0;				√	√
Rv0431	Rv0431	cell wall and cell processes	unknown	20463.8	0.0206251	42	0.0481211
eccE5	Rv1797	cell wall and cell processes	unknown	20461.1	0.0607339	102	0.0485218						√
hisH	Rv1602	intermediary metabolism and respiration	Histidine biosynthesis pathway (fifth step). Catalyzes an amidotransferase reaction that generates imidazole-glycerol phosphate and 5-aminoimidazol-4-carboxamide ribonucleotide, which is used for purine synthesis.	20447.5	0.00236353	49	0.0481059					√		√
hemD	Rv0511	intermediary metabolism and respiration	Possibly involved in the biosynthesis of siroheme and cobalamin [catalytic activity: 2 S-adenosyl-L-methionine + uroporphyrin III = 2 S-adenosyl-L-homocysteine + sirohydrochlorin].	20102.9	0.00593232	54	0.0482079
Rv1794	Rv1794	conserved hypotheticals	unknown	19814.7	0.0504542	88	0.0484606
Rv2700	Rv2700	cell wall and cell processes	unknown	19611.6	0.0805253	132	0.0487237					√
pafA	Rv2097c	intermediary metabolism and respiration	Ligates deamidated pup to proteasomal substrate proteins. Requires hydrolysis of ATP to ADP.	19334.7	0.00727773	57	0.0482661					√	√
Rv2647	Rv2647	insertion seqs and phages	unknown	19166.8	0.00120181	12	0.0471565
Rv1044	Rv1044	conserved hypotheticals	unknown	19090.5	0.00366201	25	0.0476557
eccE3	Rv0292	cell wall and cell processes	unknown	18595.6	0.0577536	93	0.0484487						√
Rv2813	Rv2813	conserved hypotheticals	unknown	18302.4	0.00110913	28	0.0477213
PPE8	Rv0355c	PE/PPE	unknown	18283.8	0.00641422	41	0.0479846
pimE	Rv1159	cell wall and cell processes	Polyprenol-phosphate-mannose dependent mannosyltransferase involved in phosphatidylinositol mannoside synthesis	17943.4	0.00710977	41	0.0479532
Rv2492	Rv2492	conserved hypotheticals	unknown	17856.3	0.00228183	27	0.0476833
aroE	Rv2552c	intermediary metabolism and respiration	Possibly involved at the fourth step in the biosynthesis of chorismate within the biosynthesis of aromatic amino acids (the shikimate pathway) [catalytic activity: shikimate + NADP(+) = 5-dehydroshikimate + NADPH].	17841.9	0.00264113	61	0.0481956
trpC	Rv1611	intermediary metabolism and respiration	Tryptophan biosynthesis pathway (fourth step) [catalytic activity: 1-(2-carboxyphenylamino)-1-deoxy-D-ribulose 5-phosphate = 1-(indol-3-YL)glycerol 3-phosphate + CO(2) + H(2)O.]	17798.8	0.00289133	57	0.0481961	3QJA;3T40;3T44;3T55;3T78;4FB7;	√			√	√	√
cysG	Rv2847c	intermediary metabolism and respiration	Involved in the biosynthesis of siroheme and cobalamin [catalytic activity: 2 S-adenosyl-L-methionine + uroporphyrin III = 2 S-adenosyl-L-homocysteine + sirohydrochlorin]. SAM-dependent methyl transferase that methylates uroporphyrinogen III at position C-2 and C-7 to form precorrin-2 and then position C-12 or C-18 to form trimethylpyrrocorphin 2. It catalyzes also the conversion of precorrin-2 i…	17485.7	0.00170993	56	0.047952
dapB	Rv2773c	intermediary metabolism and respiration	Involved in biosynthesis of diaminopimelate and lysine from aspartate semialdehyde (at the second step) [catalytic activity: 2,3,4,5-tetrahydrodipicolinate + NAD(P)(+) = 2,3-dihydrodipicolinate + NAD(P)H].	17351.9	0.00189924	52	0.0480259	1C3V;1P9L;1YL5;1YL6;1YL7;
Rv0249c	Rv0249c	intermediary metabolism and respiration	Could be involved in interconversion of fumarate and succinate (aerobic respiration). This hydrophobic component may be required to anchor the catalytic components of the succinate dehydrogenase complex to the cytoplasmic membrane.	17255.2	0.0201758	61	0.0483144
aftA	Rv3792	cell wall and cell processes	Involved in the biosynthesis of the mycobacterial cell wall arabinan	17136.6	0.0366256	76	0.0483487
Rv2474c	Rv2474c	conserved hypotheticals	unknown	17136	0.0333158	70	0.0484096
murA	Rv1315	cell wall and cell processes	Involved in cell wall formation; peptidoglycan biosynthesis. Adds enolpyruvyl to UDP-N-acetylglucosamine [catalytic activity: phosphoenolpyruvate + UDP-N-acetyl-D- glucosamine = phosphate + UDP-N-acetyl-3-O-(1-carboxyvinyl)-D-glucosamine]	16958.7	0.00392546	66	0.0480878					√	√
Rv0955	Rv0955	cell wall and cell processes	unknown	16952.1	0.0461214	72	0.0484363
prrB	Rv0902c	regulatory proteins	Sensor part of the two component regulatory system PRRA/PRRB. Thought to be involved in the environmental adaptation, specifically in an early phase of the intracellular growth.	16640.2	0.021116	42	0.0480668	1YS3;1YSR;
priA	Rv1402	information pathways	Recognizes a specific hairpin sequence on PHIX SSDNA; this structure is then recognized and bound by proteins PRIB and PRIC. Formation of the primosome proceeds with the subsequent actions of DNAB, DNAC, DNAT and primase. PRIA then functions as a helicase within the primosome	16635.8	0.00449126	67	0.0481803
Rv1711	Rv1711	conserved hypotheticals	unknown	16528.1	0.00189564	59	0.0480376		√			√	√
Rv2455c	Rv2455c	intermediary metabolism and respiration	probably involved in cellular metabolism.	16318.1	0.00160155	54	0.0480603							√
Rv0658c	Rv0658c	cell wall and cell processes	Supposedly involved in stationary-phase survival.	16228.7	6.79632e-06	5	0.0454441
lprD	Rv1343c	cell wall and cell processes	unknown	16204	0.0485647	104	0.0486196
espG3	Rv0289	cell wall and cell processes	unknown	16198.6	0.0750017	108	0.0485498					√	√
ndh	Rv1854c	intermediary metabolism and respiration	Transfer of electrons from NADH to the respiratory chain. The immediate electron acceptor for the enzyme is believed to be ubiquinone. Does not couple the redox reaction to proton translocation.	16198	0.00177702	37	0.0479642
Rv1024	Rv1024	cell wall and cell processes	unknown	16154	0.00973378	52	0.0482349					√	√
Rv2172c	Rv2172c	conserved hypotheticals	unknown	15838.4	0.0700059	106	0.0485349
Rv2980	Rv2980	cell wall and cell processes	unknown	15756.9	0.0316808	69	0.0483333
ideR	Rv2711	regulatory proteins	Transcriptional regulatory protein (repressor and activator), iron-binding repressor of siderophore biosynthesis and iron uptake. Seems to regulate a variety of genes encoding a variety of proteins e.g. transporters, proteins involved in siderophore synthesis and iron storage, members of the PE/PPE family, enzymes involved in lipid metabolism, transcriptional regulatory proteins, etc. Also activa…	15661.2	0.00590289	41	0.0481721	1B1B;1FX7;1U8R;2ISY;2ISZ;2IT0;				√	√
rplJ	Rv0651	information pathways	Involved in translation mechanisms.	15638.9	0.0125516	118	0.0483623					√	√
Rv3843c	Rv3843c	cell wall and cell processes	unknown	15604.2	0.0490485	76	0.048473
Rv1128c	Rv1128c	insertion seqs and phages	unknown	15471.7	0.0292022	73	0.0484268					√
aftB	Rv3805c	cell wall and cell processes	Involved in the biosynthesis of the mycobacterial cell wall arabinan	15423.2	0.0387303	70	0.0483895
panD	Rv3601c	intermediary metabolism and respiration	Involved in pantothenate biosynthesis [catalytic activity: L-aspartate = beta-alanine + CO(2)].	15341.2	0.00251573	49	0.0481235	2C45;						√
dop	Rv2112c	intermediary metabolism and respiration	Deamidates the C-terminal glutamine of pup	15258.4	0.00860156	58	0.0483003					√	√
Rv2191	Rv2191	information pathways	unknown	15224.3	0.00890799	45	0.0483546
Rv0383c	Rv0383c	cell wall and cell processes	unknown	15151.2	0.026303	65	0.0483186						√
ldtB	Rv2518c	cell wall and cell processes	Involved in peptidoglycan synthesis. Catalyzes the formation of 3->3 crosslinks between peptidoglycan subunits.	14995.9	0.00281853	25	0.0477322	3VYN;3VYO;3VYP;4GSQ;4GSR;4GSU;4HU2;4HUC;				√	√
Rv3531c	Rv3531c	conserved hypotheticals	unknown	14827.2	0.00969415	42	0.0480417
rpsT	Rv2412	information pathways	Involved in translation mechanisms. Binds directly to 16S ribosomal RNA.	14768.7	0.00747686	73	0.0479189		√			√	√
sigB	Rv2710	information pathways	The sigma factor is an initiation factor that promotes attachment of the RNA polymerase to specific initiation sites and then is released. May control the regulons of stationary phase and general stress resistance. Seems to be regulated by sigh (Rv3223c product) and SIGE (Rv1221 product). Seems to regulate KATG|Rv1908c and the heat-shock response.	14727.1	0.00401588	53	0.0481445					√
Rv3660c	Rv3660c	virulence, detoxification, adaptation	Possibly plays a regulatory role in celular differentiation.	14637.5	0.00968739	43	0.048086		√			√	√
Rv3635	Rv3635	cell wall and cell processes	unknown	14474.5	0.0499309	77	0.0484683
rslA	Rv0736	information pathways	Regulates negatively SIGL|Rv0735	14264.9	0.0153628	50	0.0483009	3HUG;				√	√
aroB	Rv2538c	intermediary metabolism and respiration	Involved at the second step in the biosynthesis of chorismate within the biosynthesis of aromatic amino acids (the shikimate pathway) [catalytic activity: 7-phospho-3-deoxy-arabino-heptulosonate = 3-dehydroquinate + orthophosphate].	14206.8	0.00232458	65	0.0481065	3QBD;3QBE;	√				√	√
Rv1575	Rv1575	insertion seqs and phages	unknown	14179.3	0.00260246	17	0.0474335
TB18.5	Rv0164	conserved hypotheticals	unknown	14149.6	0.0202109	39	0.048144
blaR	Rv1845c	cell wall and cell processes	Involved in transcriptional mechanism	14084	0.0186681	44	0.0481715
glfT2	Rv3808c	cell wall and cell processes	Converts UDP-galactofuranose in cell wall galactan polymerization. Has UDP-Galf:beta-D-(1->5) and UDP-Galf:beta-D-(1->6) galactofuranosyltransferase activities.	13873.8	0.00814938	51	0.0480131	4FIX;4FIY;	√			√
ftsQ	Rv2151c	cell wall and cell processes	This protein may be involved in septum formation.	13691.7	0.00889638	54	0.0481475					√	√
Rv0455c	Rv0455c	conserved hypotheticals	unknown	13637.8	0.0875146	125	0.0487417
eis	Rv2416c	virulence, detoxification, adaptation	Acetylation, substrate unknown. Involved in intracellular survival. Possibly associated with the cell surface and secreted. Modulates cytokine secretion by host immune cells.	13419.6	0.00771849	39	0.0482891	3R1K;3RYO;3SXO;3UY5;
icd2	Rv0066c	intermediary metabolism and respiration	Involved in the KREBS cycle [catalytic activity: isocitrate + NADP+ = 2-oxoglutarate + CO(2) + NADPH].	13193.8	0.000848861	34	0.0476937
leuD	Rv2987c	intermediary metabolism and respiration	Involved in leucine biosynthesis (at the second step) [catalytic activity: 3-isopropylmalate = 2-isopropylmaleate + H(2)O (also catalyses 2-isopropylmaleate + H(2)O = 3-hydroxy-4-methyl-3-carboxypentanone)].	13133.9	0.0017555	52	0.0479834	3H5E;3H5H;3H5J;						√
hupB	Rv2986c	information pathways	This protein belongs to the histone like family of prokaryotic DNA-binding proteins which are capable of wrapping DNA to stabilize it, and prevent its denaturation under extreme environmental conditions.	13109.9	0.00315177	40	0.0481223	4DKY;4PT4;	√		√		√
lpqF	Rv3593	cell wall and cell processes	unknown	12906.4	0.0452372	57	0.0481879
rne	Rv2444c	information pathways	Thought to be involved in several cellular process.	12851.1	0.0032672	42	0.0479793
cmk	Rv1712	intermediary metabolism and respiration	Catalyzes the transfer of a phosphate group from ATP to either CMP or dCMP to form CDP or dCDP and ADP [catalytic activity: ATP + CMP = ADP + CDP].	12815.7	0.00219168	62	0.0480195							√
PPE4	Rv0286	PE/PPE	unknown	12808.9	0.0395337	75	0.0482626		√		√		√
cobC	Rv2231c	intermediary metabolism and respiration	Involved in cobalamin biosynthesis	12806	0.00221828	39	0.0478112		√
mmpL9	Rv2339	cell wall and cell processes	Thought to be involved in fatty acid transport.	12728.3	0.00892449	29	0.047923
sirA	Rv2391	intermediary metabolism and respiration	Catalyzes the reduction of sulfite to sulfide, in the biosynthesis of sulfur-containing amino acids and co-factors	12401.7	0.00120635	45	0.0478748	1ZJ8;1ZJ9;	√			√	√
eccC5	Rv1783	cell wall and cell processes	unknown	12333.3	0.0102634	46	0.0480009
Rv0051	Rv0051	cell wall and cell processes	unknown	12332.3	0.026025	65	0.0483504
